# Supplementary material for: Cotton RSG2 Mediates Plant Resistance against Verticillium dahliae by miR482b Regulation
Source: MDPI journal article supplement (doi:10.3390/biology12070898), 2023-06-23
Supplement: s1 [file s1]

## Supplementary Figures

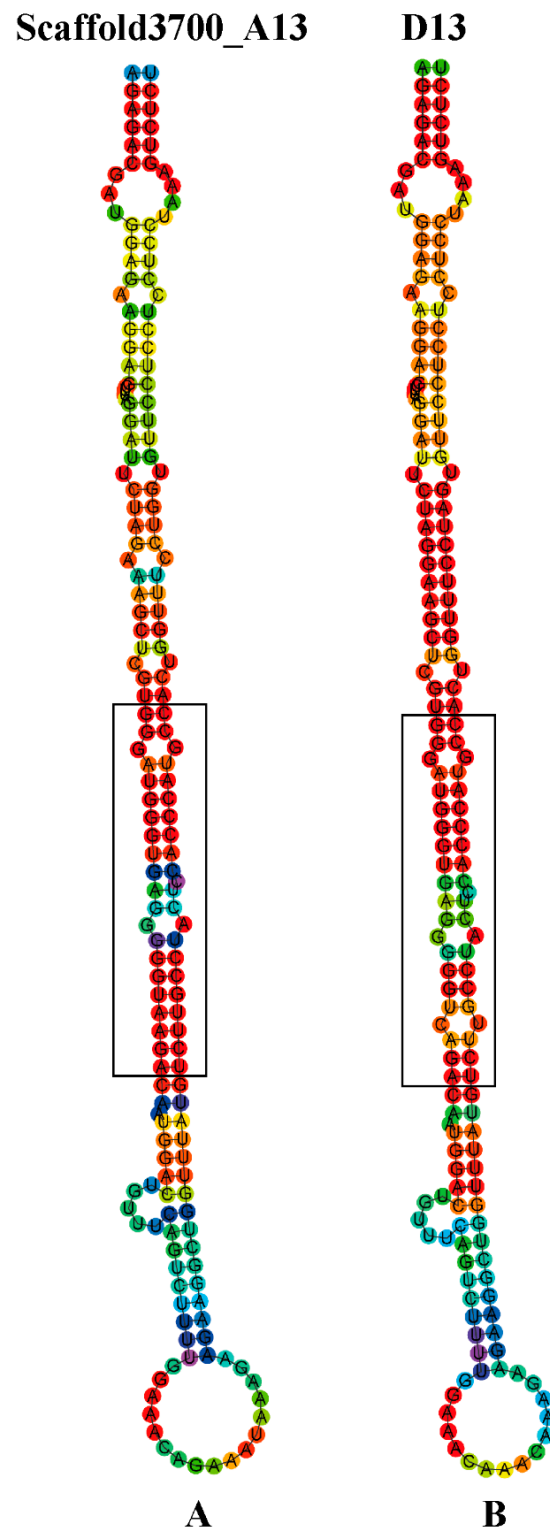

**Figure S1.** Secondary structures of two ghr-miR482b precursors located on A (A) and D (B) genome, respectively. The black box area represents the location of the mature sequence of ghr-miR482b.

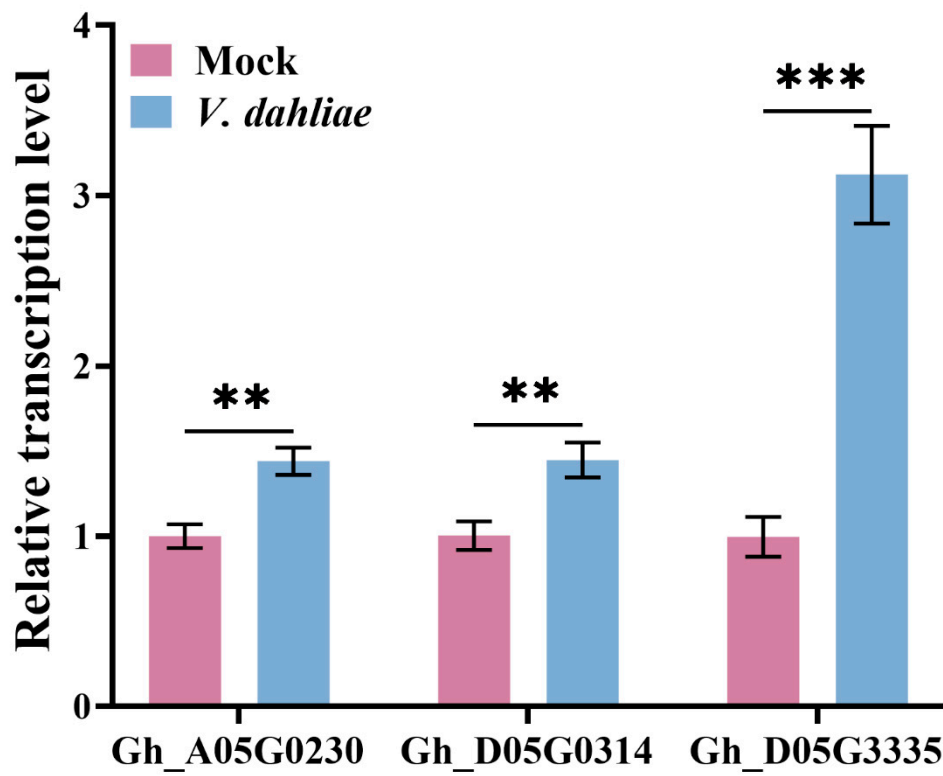

**Figure S2.** Relative transcription level of three *GhCNLS* genes in mock- and *V. dahliae*-infected leaves at 12 h. The experiment was carried out three times and analyzed using Student's *t*-test. The values represent the mean  $\pm$  standard deviation. The \* represented significant difference, \*\*  $p < 0.01$ , \*\*\*  $p < 0.001$ .

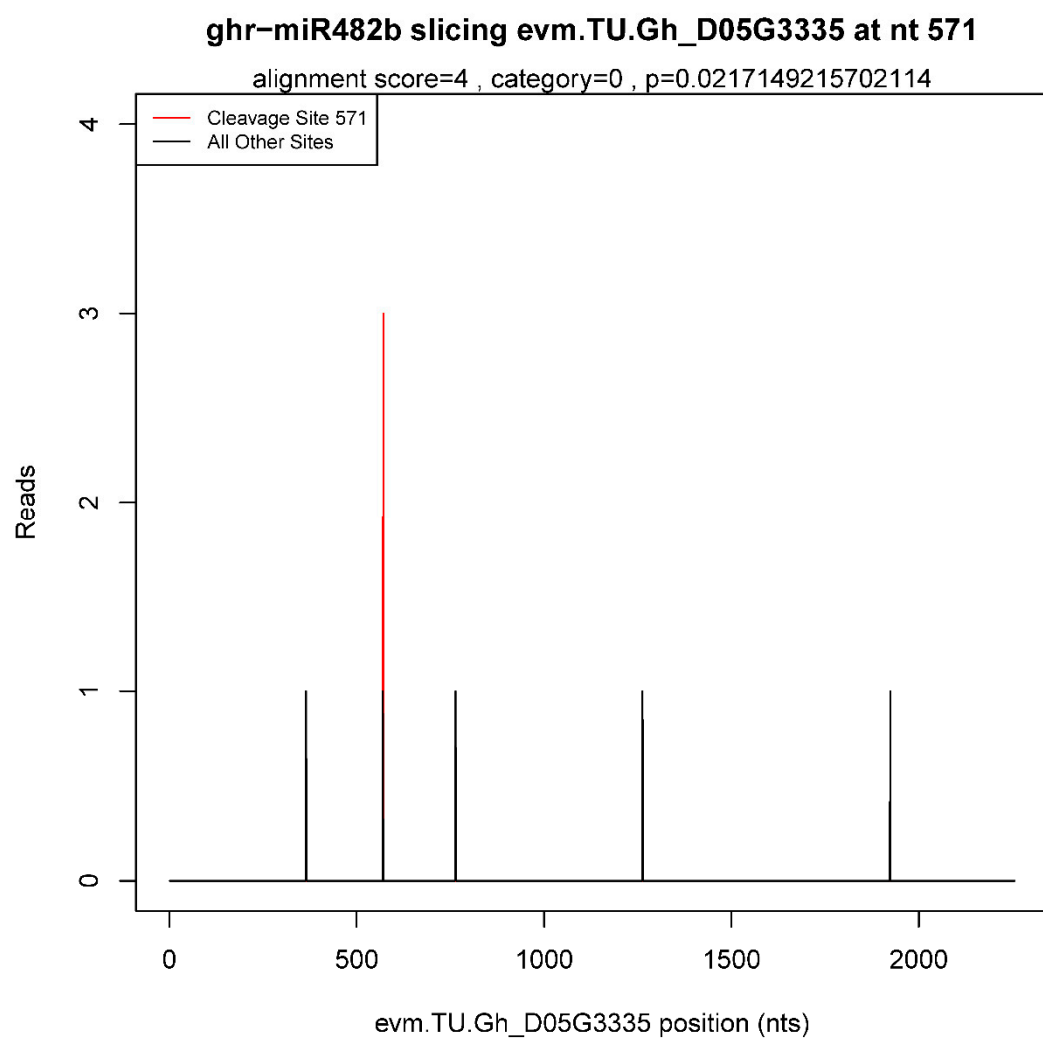

**Figure S3.** Degradation group data of ghr-miR482b directed the cleavage of Gh\_D05G3335 transcripts at 571 nt.

**A****pTRVe - miR482b OX**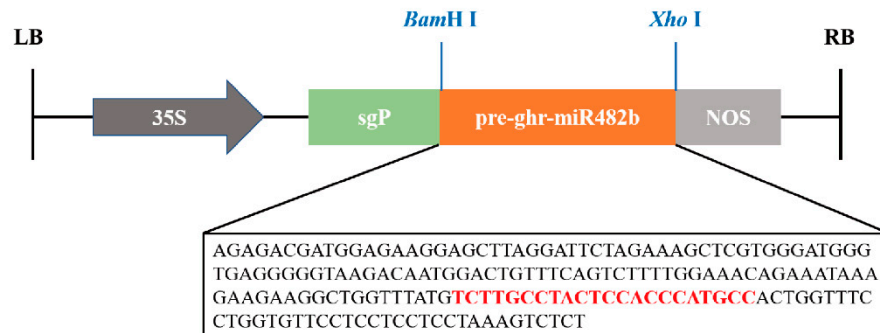**B****pTRVe - miR482b KD**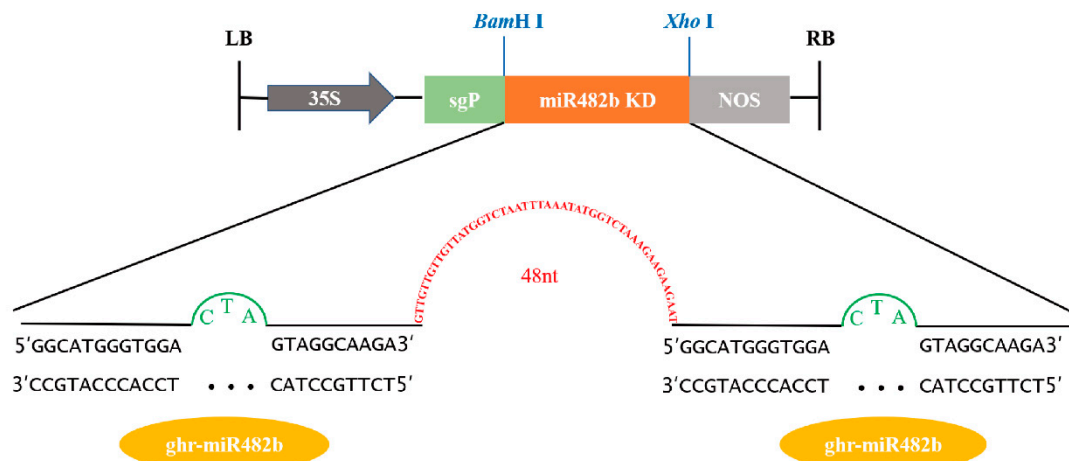

**Figure S4.** Schematic diagram of vectors for overexpression and knockdown of ghr-miR482b. **(A)** Schematic diagram of the vector for ghr-miR482b overexpression. **(B)** Schematic diagram of the vector for ghr-miR482b knockdown.

**A**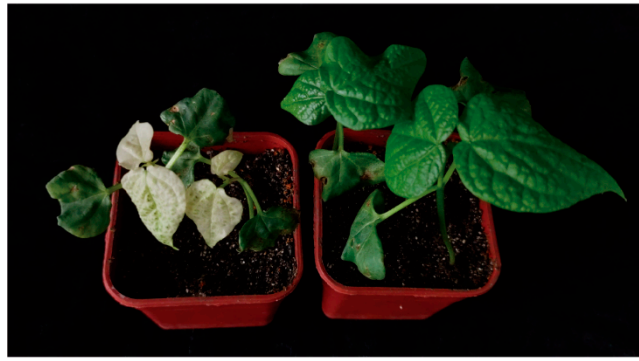**B**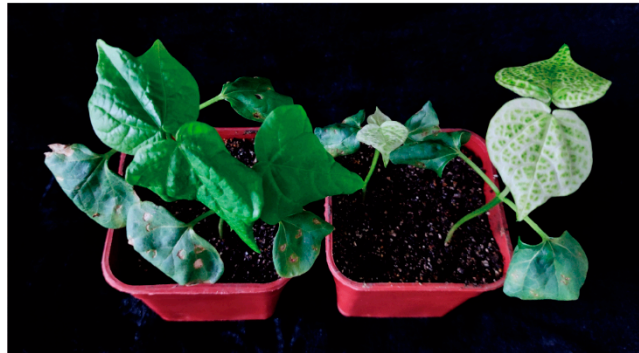

**Figure S5.** Albino phenotype of GhPDS plants 10 days after injection of Agrobacterium. **(A)** Albino phenotype of GhPDS plants in *ghr-miR482b* overexpression and knockdown experiments. **(B)** Albino phenotype of GhPDS plants in *GhRSG2* silencing experiments.

### pTRV2 - GhRSG2

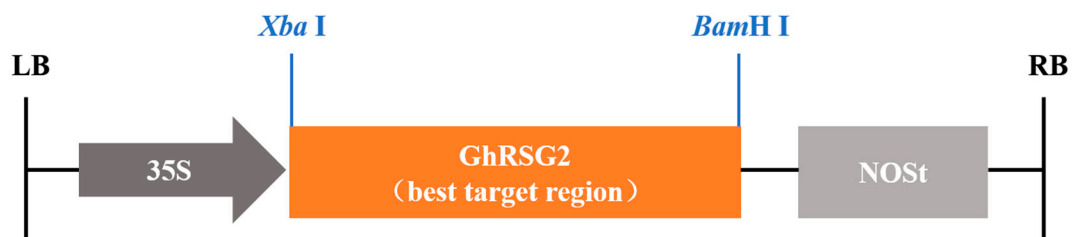

**Figure S6.** Schematic diagram of *GhRSG2* silent vector.
