# Supplementary material for: Cotton RSG2 Mediates Plant Resistance against Verticillium dahliae by miR482b Regulation
Source: Biology (Basel). 2023 Jun 23;12(7):898. doi: 10.3390/biology12070898 (PMC10376429; doi:10.3390/biology12070898)
Supplement: Supplementary file 1 [file biology-12-00898-s001.zip › Supplemental Table S1.xlsx]

## Sheet: Sheet1
Supplementary Table S1. Primers used in this study
Primer name	sequence(5'-3')	For use
pBI121-miR482b-F	ACGGGGGACTCTAGAGGATCCAGAGACGATGGAGAAGGAGCTTAG	GUS staining
pBI121-miR482b-R	GGGAAATTCGAGCTCCTCGAGAGAGACTTTAGGAGGAGGAGGAACA	GUS staining
pBI121-GhRSG2-GUS-F	GAGAACACGGGGGACTCTAGAATGGGTTGCGGATTTTGTGA	GUS staining
pBI121-GhRSG2-GUS-R	GGACTGACCACCCGGGGATCCTTACACATATTCAAATAGTTGCTTGCC	GUS staining
pBI121-mGhRSG2-GUS-BF	GGTTATGGGGAATGGGCGGCGTCGGGAAAACCACCCTG	GUS staining
pBI121-mGhRSG2-GUS-BR	GCCAGGGTGGTTTTCCCGACGCCGCCCATTCCCCATAAC	GUS staining
pTRVe-miR482b OX-F	GTTAACGAGCCATGGGGATCCAGAGACGATGGAGAAGGAGC	TRV: miR482b OX
pTRVe-miR482b OX-R	GGGACATGCCCGGGCCTCGAGAGAGACTTTAGGAGGAGGAG	TRV: miR483b OX
pTRVe-miR482b KD-F	CGAGCCATGGGGATCCGGCATGGGTGGACAGGTAGGCAAGAGTTGTTGTTGTTATGGTC	TRV: miR482b KD
pTRVe-miR482b KD-R	TGCCCGGGCCTCGAGTCTTGCCTACCTGTCCACCCATGCCATTCTTCTTCTTTAGACCA	TRV: miR483b KD
pTRV2-GhRSG2-F	AAGGTTACCGAATTCTCTAGATCATGAGTGGCAAGCTGCATA	TRV: GhRSG2
pTRV2-GhRSG2-R	CGTGAGCTCGGTACCGGATCCTTTCTCCGCAATCTAGCAACAA	TRV: GhRSG2
t-5.8s-R	TGTCGTATCCAGTGCAGGGTCCGAGGTATTCGCACTGGATACGACGTGTGA	cDNA synthesis
t-miR482b-R	GTCGTATCCAGTGCAGGGTCCGAGGTATTCGCACTGGATACGACGGCATG	cDNA synthesis
q-5.8s-F	ATTAGGCCGAGGGCACGTCTG	RT-qPCR
q-miR482b-F	GCGTCGTCTTGCCTACTCCACC	RT-qPCR
q-miRNA-UR	GTGCAGGGTCCGAGGT	RT-qPCR
q-GhUBQ7-F	GAAGGCATTCCACCTGACCAAC	RT-qPCR
q-GhUBQ7-R	CTTGACCTTCTTCTTCTTGTGCTTG	RT-qPCR
q-Gh_D05G3335-F	AACGGCGGTACCTAAAGAGG	RT-qPCR
q-Gh_D05G3335-R	TGGGTGACCCTCCACCTTAT	RT-qPCR
q-Gh_A05G0230-F	GCTTGGGCCTTACTGAAGCA	RT-qPCR
q-Gh_A05G0230-R	TCTAAGAGCAGACATTGATTGGC	RT-qPCR
q-Gh_D05G0314-F	AGTGATTGATTGCCCGAAGC	RT-qPCR
q-Gh_D05G0314-R	TTTGGTGTTGACTTCCTCCCAT	RT-qPCR
q-ITS1-F	AAAGTTTTAATGGTTCGCTAAGA	RT-qPCR
q-ST-Ve1-R	CTTGGTCATTTAGAGGAAGTAA	RT-qPCR
q-GhPR1-F	GGGGCAGTGCTGACCTATCG	RT-qPCR
q-GhPR1-R	TTAGCACAACCAAGATGGACAGAGT	RT-qPCR
q-GhPR2-F	CCACCAGCAGCAGAAGTTATCG	RT-qPCR
q-GhPR2-R	TTCAAGGTTTGCACTCGGAAGA	RT-qPCR
q-GhPR3-F	GATGACTCCACAATCACCGAAGC	RT-qPCR
q-GhPR3-R	GCGGTCTTCTACCTGGGCATT	RT-qPCR
q-GhPR4-F	TAGCCGTGTTCCAGCAGATTG	RT-qPCR
q-GhPR4-R	TTTTGGCTTTTTCTCTTTATC	RT-qPCR
